# Supplementary material for: Bone marrow-derived and resident liver macrophages display unique transcriptomic signatures but similar biological functions
Source: PubMed Central journal article supplement (PMC5028381; doi:10.1016/j.jhep.2016.05.037), 2016-10
Supplement: mmc1.pdf [file mmc1.pdf]

# **Bone marrow-derived and resident liver macrophages display unique transcriptomic signatures but similar biological functions**

Lynette Beattie, Amy Sawtell, Jason Mann, Teija CM Frame, Bianca Teal, Fabian de Labastida Rivera, Najmeeyah Brown, Katherine Walwyn-Brown, John W.J. Moore, Sandy MacDonald, Eng-Kiat Lim, Jane E Dalton, Christian R Engwerda, Kelli P MacDonald, Paul M. Kaye

## **Table of contents**

|                                                 |           |
|-------------------------------------------------|-----------|
| <b>Supplementary materials and methods.....</b> | <b>2</b>  |
| <b>Supplementary Table 1.....</b>               | <b>8</b>  |
| <b>References.....</b>                          | <b>13</b> |

## **Materials and methods:**

### *Mice and Infection*

C57BL6 or B6.CD45.1 mice were obtained from Charles River (UK) or the Australian Resource Centre (WA). mT/mG [1], lysMcre [2] and B6.MacGreen [3] mice have been previously described. Mice were bred and housed under specific pathogen-free conditions and used at 6–12 weeks of age. The Ethiopian strain of *Leishmania donovani* (LV9) and tandem Tomato fluorescent protein expressing LV9 (tdTom.LV9) [4] were maintained by serial passage in Rag-1<sup>-/-</sup> mice. Amastigotes were isolated from infected spleens [5], and mice were infected with  $3 \times 10^7$  *L. donovani* amastigotes intravenously (i.v.) via the tail vein in 200  $\mu$ l of RPMI 1640 (GIBCO, UK). For the generation of chimeras, mice were placed on acidified water for at least 2 days prior to irradiation. Donor mice were irradiated with 1100 rads on a split-dose regimen (550 rads per dose, 24hours apart) and were then reconstituted with  $2-5 \times 10^6$  donor bone marrow cells via tail vein injection. Reconstituted mice were treated with oral antibiotics (Baytril) for 4 weeks post-reconstitution.

### *Liver enzyme analysis*

Heparinized blood was immediately centrifuged for 10 min at  $300 \times g$ . Plasma was stored at  $-80^\circ\text{C}$  until analysis. Alanine aminotransferase (ALT) and aspartate transaminase (AST) levels were determined using a Beckman Unicell DxC800 analyzer in a single batch.

### *Image Analysis*

For 4D analysis, 20-3 5µm Z stacks were acquired with a Z distance of 2 µm approximately every 15-30sec. Data were rendered and analysed using Volocity software (Perkin Elmer) and cell analysis performed automatically with manual checking as previously described [6].

### *Confocal Microscopy*

Confocal microscopy was performed on 20 µm frozen sections. For tissue containing tdTom expressing parasites, tissues were fixed in 4% paraformaldehyde (PFA) for two hours before overnight incubation in 30% sucrose and embedding in OCT medium (Sakura). Antibodies were conjugated to Alexa488 or Alexa647 (eBioscience, UK). Slides were blinded before imaging on a Zeiss LSM510 axioplan microscope (Carl Zeiss Microimaging). Data were rendered and analysed using Volocity software (Improvision).

### *Flow cytometry and cell sorting*

Hepatic mononuclear cells were prepared from the livers of chimeric mice. 20 chimeric mice were used for the microarray study. We conducted five independent sorts to generate samples for analysis. For each sorting experiment (n=4 mice), we isolated both YS-derived and BM-derived KC from liver mononuclear cells that were pooled prior to sorting. 3 of the experiments were performed on chimeric mice that contained GFP<sup>+</sup> liver resident KCs and 2 experiments were performed on chimeric mice that contained GFP<sup>+</sup> BM derived KCs. To isolate liver mononuclear cells, livers were perfused with 0.4mg/mL of warmed liberase TL (Roche) then removed,

homogenised with a scalpel blade and digested at 37°C for 45min. Digested livers were passed over 100 µm cell strainers, washed in PBS containing 2%FCS and resuspended in 33% percoll for centrifugation at 693g for 12min. The remaining cell pellet was kept for further analysis. Isolated cells were blocked with anti CD16/32 then labelled with F4/80-Alexa488, GR-1 PeCy7 (eBioscience) and CR1g (clone 14G6, Helmy Cell 2006, provided by Genentech Inc) that was conjugated to Atto 647H via lightning-link conjugation (Innova Biosciences). Cells were sorted on a MoFlo cell sorter (DAKO) based on expression of cell surface markers and GFP. Sorted cells were pelleted and resuspended in Trizol (Invitrogen). A small fraction of cells (approximately 3000 sorted cells) were spun onto glass slides, fixed in methanol and stained with Giemsa for morphological analysis.

### *Real-time PCR*

Purified cells were resuspended and frozen in QIAzol lysis buffer. RNA was isolated using a miRNA easy kit (QIAGEN). RNA was reverse transcribed into cDNA with a Superscript III first-strand synthesis kit (Invitrogen). Real-time quantitative PCR was performed with Fast SYBR green PCR master mix in a StepOne Plus Real-Time PCR system (Applied Biosystems). Accumulation of target genes was normalized to HPRT, (results were the same if normalised to  $\beta$ -actin [7] or ribosomal protein L32 [8]) and expressed as relative expression via the change in cycle threshold ( $\Delta\Delta CT$ ) analysis method (relative expression in test sample versus RPMI controls). Oligonucleotides used for the specific amplification of target genes were; Timd-4: AGAATGTGCGCTTGGAGCTGAG/GGTTGGGAGAACAGATGTGGTC, CD163: GGCTAGACGAAGTCATCTGCAC/CTTCGTTGGTCAGCCTCAGAGA,

Colec12: ACTCCAAGCACGGTCAGCTCAT/CTTGTTGCCAGTTGGACCAGGT,  
Ric3: GGTAGTGGAAGAGGACTGATGG/AGTGGAGCAGTTCCGATCCTCT, Clec4f:  
TCACAGCCTTGGAGACCTGAGT/CCTAAGCCTCTGGATAGCCACT, MARCO:  
ATGGCACCAAGGGAGACAAAGG/GCCTGGTTTTCCAGCATCACCT.

### *RBC Phagocytosis*

BM chimeric mice were generated as described above. Two or six weeks post irradiation and bone marrow transplantation, desialyated and labelled red blood cells were transferred IV as described [9]. Briefly, normal mouse red blood cells were labelled with 2-mM solution of PKH-26 (Sigma) for 5min at 25°C. The labelled cells were then treated with 0.012U of *Arthrobacter ureafaciens* and *Vibrio cholera* neuraminidases (Sigma) for 1hr at 37°C. A chimeric mouse that received no red blood cell injection was used as a control.

### *LPS Treatment*

BM chimeric mice were generated as described above with C57BL/6 recipients and B6.CD45.1 donors. Six weeks after bone marrow transplant, the recipient mice were injected with 100ug LPS (Sigma) intravenously. 24hrs post-injection, the mice were sacrificed, and the livers prepared for cell sorting as described above. KCs were sorted based on expression of CD45.1/.2, CR1g and F4/80.

### *In Vivo Bacterial Uptake Assay*

*Salmonella enterica* subspecies *enterica* serovar Typhimurium (*S. typhimurium*), *Neisseria meningitidis* or *Listeria monocytogenes* were grown to an optical density of 0.8 and 600nm and then washed and heat-killed for 2hrs at 60°C and stored at 4°C until use. Heat-killed bacteria were labelled with SYTO 62 (Molecular Probes) for 30 mins at RT. Labelled bacteria were injected intravenously into the tail vein of B6.MacGreen → B6.CD45.1 chimeric mice, and the livers removed after 2 hours. Whole, unfixed liver tissue was imaged on a Zeiss 780 NLO 2-photon microscope (Carl Zeiss Microimaging). Images were acquired with a 40x 1.1 water immersion objective and fluorescence excitation provided by a Chameleon XR Ti:sapphire laser (Coherent) tuned to 900nm. For quantitation via flow cytometry, hepatic mononuclear cells were prepared and samples labelled with F4/80 (PE) (BioLegend) before acquisition using a BD LSR Fortessa (BD). SYTO 62 was detected in the APC (R670/14) channel. Data was analysed using FlowJo v10 OSX software (Treestar, Oregon).

#### *Uptake of acetylated LDL*

Hepatic mononuclear cells were prepared from B6.MacGreen → B6.CD45.1 chimeric mice (8 mice, 4 pools of 2 livers) and depleted of B and T cells using EasySep mouse biotin selection kit (Stemcell Technologies). Samples were labelled with F4/80 (PE-Cy7), CD11b (PerCP-Cy5.5), CD45.1 (PE), CD45.2 (AF700) and Tim4 (AF647) and then incubated with 10µg/mL Alexa Flour 594 AcLDL (Molecular Probes) for 1 hr at 37°C. Flow cytometry acquisition was performed using a BD LSR

Fortessa (BD) and data was analysed using FlowJo v10 OSX software (Treestar, Oregon).

**Supplementary Table 1:**

**Gene Ontology terms over-represented in the analysis of genes expressed by YS-derived but not BM-derived KCs.**

| <b>GO ACCESSION</b>              | <b>GO Term</b>                         | <b>p-value</b> | <b>Count in Selection</b> |
|----------------------------------|----------------------------------------|----------------|---------------------------|
| GO:0055065                       | metal ion homeostasis                  | 0.0002         | 5                         |
| GO:0055080                       | cation homeostasis                     | 0.0003         | 5                         |
| GO:0034394                       | protein localization to cell surface   | 0.0003         | 2                         |
| GO:0050801                       | ion homeostasis                        | 0.0004         | 5                         |
| GO:0006875                       | cellular metal ion homeostasis         | 0.0010         | 4                         |
| GO:0006897 GO:0016193 GO:0016196 | endocytosis                            | 0.0014         | 4                         |
| GO:0030003                       | cellular cation homeostasis            | 0.0014         | 4                         |
| GO:0004900                       | erythropoietin receptor activity       | 0.0015         | 1                         |
| GO:0004411                       | homogentisate 1,2-dioxygenase activity | 0.0015         | 1                         |
| GO:0033292                       | T-tubule organization                  | 0.0015         | 1                         |
| GO:0006873                       | cellular ion homeostasis               | 0.0017         | 4                         |
| GO:0005044                       | scavenger receptor activity            | 0.0018         | 2                         |
| GO:0048878                       | chemical homeostasis                   | 0.0019         | 5                         |
| GO:0055082                       | cellular chemical homeostasis          | 0.0023         | 4                         |
| GO:0006788                       | heme oxidation                         | 0.0030         | 1                         |
| GO:0031783                       | type 5 melanocortin receptor           | 0.0030         | 1                         |



|                           |                                                         |        |   |
|---------------------------|---------------------------------------------------------|--------|---|
|                           | binding                                                 |        |   |
| GO:0086036                | regulation of cardiac muscle cell<br>membrane potential | 0.0030 | 1 |
| GO:0005686                | U2 snRNP                                                | 0.0030 | 1 |
| GO:0036017                | response to erythropoietin                              | 0.0030 | 1 |
| GO:0004392                | heme oxygenase (decyclizing)<br>activity                | 0.0030 | 1 |
| GO:0036018                | cellular response to erythropoietin                     | 0.0030 | 1 |
| GO:0032764                | negative regulation of mast cell<br>cytokine production | 0.0030 | 1 |
| GO:0038162                | erythropoietin-mediated signaling<br>pathway            | 0.0030 | 1 |
| GO:0070436                | Grb2-EGFR complex                                       | 0.0030 | 1 |
| GO:0031780 GO:0<br>071856 | corticotropin hormone receptor<br>binding               | 0.0030 | 1 |
| GO:0055072                | iron ion homeostasis                                    | 0.0032 | 2 |
| GO:0038024                | cargo receptor activity                                 | 0.0035 | 2 |
| GO:0015891 GO:0<br>015892 | siderophore transport                                   | 0.0045 | 1 |
| GO:0032763                | regulation of mast cell cytokine<br>production          | 0.0045 | 1 |
| GO:0015688                | iron chelate transport                                  | 0.0045 | 1 |
| GO:0070996                | type 1 melanocortin receptor<br>binding                 | 0.0045 | 1 |

|            |                                                       |        |   |
|------------|-------------------------------------------------------|--------|---|
| GO:0033212 | iron assimilation                                     | 0.0045 | 1 |
| GO:0042167 | heme catabolic process                                | 0.0045 | 1 |
| GO:0033214 | iron assimilation by chelation and transport          | 0.0045 | 1 |
| GO:0004566 | beta-glucuronidase activity                           | 0.0045 | 1 |
| GO:0046149 | pigment catabolic process                             | 0.0045 | 1 |
| GO:0019725 | cellular homeostasis                                  | 0.0047 | 4 |
| GO:0006909 | phagocytosis                                          | 0.0051 | 2 |
| GO:0006874 | cellular calcium ion homeostasis                      | 0.0054 | 3 |
| GO:0086018 | SA node cell to atrial cardiac muscle cell signalling | 0.0060 | 1 |
| GO:0086015 | SA node cell action potential                         | 0.0060 | 1 |
| GO:0031781 | type 3 melanocortin receptor binding                  | 0.0060 | 1 |
| GO:0043305 | negative regulation of mast cell degranulation        | 0.0060 | 1 |
| GO:0033015 | tetrapyrrole catabolic process                        | 0.0060 | 1 |
| GO:0006787 | porphyrin-containing compound catabolic process       | 0.0060 | 1 |
| GO:0031782 | type 4 melanocortin receptor binding                  | 0.0060 | 1 |
| GO:0031779 | melanocortin receptor binding                         | 0.0060 | 1 |
| GO:0055074 | calcium ion homeostasis                               | 0.0062 | 3 |
| GO:0072503 | cellular divalent inorganic cation                    | 0.0063 | 3 |

|            |                                                                               |        |   |
|------------|-------------------------------------------------------------------------------|--------|---|
|            | homeostasis                                                                   |        |   |
| GO:0055076 | transition metal ion homeostasis                                              | 0.0066 | 2 |
| GO:0055001 | muscle cell development                                                       | 0.0073 | 2 |
| GO:0072507 | divalent inorganic cation<br>homeostasis                                      | 0.0073 | 3 |
| GO:0005134 | interleukin-2 receptor binding                                                | 0.0075 | 1 |
| GO:0001537 | N-acetylgalactosamine 4-O-<br>sulfotransferase activity                       | 0.0075 | 1 |
| GO:2000369 | regulation of clathrin-mediated<br>endocytosis                                | 0.0075 | 1 |
| GO:0033007 | negative regulation of mast cell<br>activation involved in immune<br>response | 0.0075 | 1 |
| GO:0044183 | protein binding involved in protein<br>folding                                | 0.0075 | 1 |
| GO:0002246 | wound healing involved in<br>inflammatory response                            | 0.0075 | 1 |
| GO:0006572 | tyrosine catabolic process                                                    | 0.0075 | 1 |
| GO:0071276 | cellular response to cadmium ion                                              | 0.0075 | 1 |
| GO:0005685 | U1 snRNP                                                                      | 0.0075 | 1 |
| GO:0086070 | SA node cell to atrial cardiac<br>muscle cell communication                   | 0.0075 | 1 |
| GO:0045766 | positive regulation of angiogenesis                                           | 0.0080 | 2 |
| GO:0005581 | collagen                                                                      | 0.0080 | 2 |

|            |                                                                                             |        |   |
|------------|---------------------------------------------------------------------------------------------|--------|---|
| GO:0043619 | regulation of transcription from RNA polymerase II promoter in response to oxidative stress | 0.0090 | 1 |
| GO:0006559 | L-phenylalanine catabolic process                                                           | 0.0090 | 1 |
| GO:0071243 | cellular response to arsenic-containing substance                                           | 0.0090 | 1 |
| GO:1902222 | erythrose 4-phosphate/phosphoenolpyruvate family amino acid catabolic process               | 0.0090 | 1 |
| GO:0004630 | phospholipase D activity                                                                    | 0.0090 | 1 |
| GO:0006954 | inflammatory response                                                                       | 0.0093 | 3 |

## References

- [1] Muzumdar MD, Tasic B, Miyamichi K, Li L, Luo L. A global double-fluorescent Cre reporter mouse. *Genesis* 2007;45:593-605.
- [2] Clausen BE, Burkhardt C, Reith W, Renkawitz R, Forster I. Conditional gene targeting in macrophages and granulocytes using LysMcre mice. *Transgenic Res* 1999;8:265-277.
- [3] Sasmono RT, Oceandy D, Pollard JW, Tong W, Pavli P, Wainwright BJ, et al. A macrophage colony-stimulating factor receptor-green fluorescent protein transgene is expressed throughout the mononuclear phagocyte system of the mouse. *Blood* 2003;101:1155-1163.
- [4] Beattie L, Peltan A, Maroof A, Kirby A, Brown N, Coles M, et al. Dynamic imaging of experimental *Leishmania donovani*-induced hepatic granulomas detects Kupffer cell-restricted antigen presentation to antigen-specific CD8 T cells. *PLoS pathogens* 2010;6:e1000805.
- [5] Smelt SC, Engwerda CR, McCrossen M, Kaye PM. Destruction of follicular dendritic cells during chronic visceral leishmaniasis. *J Immunol* 1997;158:3813-3821.
- [6] Beattie L, d'El-Rei Hermida M, Moore JW, Maroof A, Brown N, Lagos D, et al. A transcriptomic network identified in uninfected macrophages responding to inflammation controls intracellular pathogen survival. *Cell host & microbe* 2013;14:357-368.
- [7] Shih VF, Davis-Turak J, Macal M, Huang JQ, Ponomarenko J, Kearns JD, et al. Control of RelB during dendritic cell activation integrates canonical and noncanonical NF-kappaB pathways. *Nature immunology* 2012;13:1162-1170.

[8] Reis BS, Rogoz A, Costa-Pinto FA, Taniuchi I, Mucida D. Mutual expression of the transcription factors Runx3 and ThPOK regulates intestinal CD4(+) T cell immunity. *Nature immunology* 2013;14:271-280.

[9] Bratosin D, Estaquier J, Ameisen JC, Aminoff D, Montreuil J. Flow cytometric approach to the study of erythrophagocytosis: evidence for an alternative immunoglobulin-independent pathway in agammaglobulinemic mice. *Journal of immunological methods* 2002;265:133-143.
