# Supplementary material for: Bone marrow-derived and resident liver macrophages display unique transcriptomic signatures but similar biological functions
Source: PubMed Central journal article supplement (PMC5028381; doi:10.1016/j.jhep.2016.05.037), 2016-10
Supplement: mmc2.pdf [file mmc2.pdf]

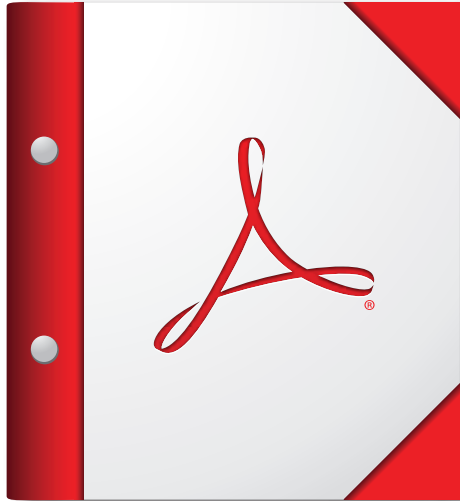

**For the best experience, open this PDF portfolio in  
Acrobat X or Adobe Reader X, or later.**

[Get Adobe Reader Now!](#)
